# Supplementary material for: Assessment of Hydrocarbon Degradation Potential in Microbial Communities in Arctic Sea Ice
Source: MDPI journal article supplement (doi:10.3390/microorganisms10020328), 2022-02-01
Supplement: s1 [file s1]

# Genome-resolved Metagenomics of Oil Degrading Microbial Community in Arctic Seaice

## Supplementary tables:

**Table S1.** The characteristics of metagenomic data of seawater (SW), sea ice (SI), and crude oil encapsulating sea ice (SIO).

**Table S2.** List of bacterial genera containing oil hydrocarbon degrading organisms added to the HDO database from this study.

**Table S3.** List of targeted hydrocarbon degradation genes.

**Table S4.** The proportions of taxonomically assigned sequences at kingdom, phylum (>1%), and class (>1%) level from all sequences, and on genus level from prokaryotic sequences in SW, SI, and SIO metagenomes.

**Table S5.** The proportions of 20 most abundant prokaryotic genera associated with degradation of oil hydrocarbons from prokaryotic sequences in SW, SI, and SIO metagenomes.

**Table S6.** Normalized counts of genes associated with degradation of alkanes in prokaryotic community of SW, SI, and SIO.

**Table S7.** Normalized counts of genes associated with monocyclic aromatic hydrocarbons degradation in prokaryotic community of SW, SI, and SIO.

**Table S8.** Normalized counts of genes associated with polycyclic aromatic hydrocarbons degradation in prokaryotic community of SW, SI, and SIO.

**Table S9.** Normalized counts of genes associated with various types of hydrocarbons degradation in prokaryotic community of SW, SI, and SIO.

**Table S10.** List of prokaryotic genera associated with one or more genes from the group of alkane degradation genes according to the affiliation of contigs of SW, SI, and SIO metagenomes.

**Table S11.** List of top100 prokaryotic genera associated with one or more genes from the group of monocyclic aromatic hydrocarbons degradation genes according to the affiliation of contigs of SW, SI, and SIO metagenomes.

**Table S12.** List of prokaryotic genera associated with one or more genes from the group of polycyclic aromatic hydrocarbons degradation genes according to the affiliation of the contigs of SW, SI, and SIO metagenomes.

**Table S13.** List of top100 prokaryotic genera associated with one or more genes from the group of genes related to the degradation of various types of hydrocarbons according to the affiliation of contigs of SW, SI, and SIO metagenomes.

**Table S14.** The characteristics of all metagenome assembled genomes (MAGs) recovered from SW, SI, and SIO metagenomes.

**Table S15.** Taxonomic classification of good quality MAGs assembled from metagenomes of SW, SI, and SIO.

## Supplementary figures:

**Figure S1.** The proportions of archaeal phyla, and the dominant archaeal genera in the prokaryotic community of SW, SI, and SIO.

**Table S1.** The numbers of total reads, and numbers and proportions (in parenthesis) of reads after the quality filtering for metagenomes obtained from the samples collected at different times (1 in superscript marks October and 2 in superscript November 2015), as well as the numbers of classified reads, metrics for coverage and diversity, and numbers of bacterial (b) archaeal (a) and unclassified (uc) contigs in pooled metagenomes of seawater (SW), sea ice (SI) and crude oil encapsulating sea ice (SIO).

| <b>Sample code</b>     | <b>Number of reads</b><br>(R1.fq + R2.fq) | <b>Number of reads after quality filtering</b> | <b>Number of classified reads</b> | <b>Coverage</b> | <b>Diversity</b> | <b>Number of contigs</b>                     |
|------------------------|-------------------------------------------|------------------------------------------------|-----------------------------------|-----------------|------------------|----------------------------------------------|
| <b>SW<sup>1</sup></b>  | 4788884<br>(1.3G + 1.4G)                  | 4270304<br>(90.8%)                             | 3892126                           | 0.58            | 20.41            | <b>75931</b><br>b_62996<br>a_2282<br>uc_4155 |
| <b>SW<sup>2</sup></b>  | 2509372<br>(2.1G + 2.2G)                  | 2389475<br>(95.2%)                             |                                   |                 |                  |                                              |
| <b>SI<sup>1</sup></b>  | 2979989<br>(1.4G + 1.5G)                  | 2799244<br>(93.9%)                             | 4108966                           | 0.58            | 20.40            | <b>84483</b><br>b_74947<br>a_1297<br>uc_3316 |
| <b>SI<sup>2</sup></b>  | 3128415<br>(1.4G + 1.7G)                  | 2947113<br>(94.2%)                             |                                   |                 |                  |                                              |
| <b>SIO<sup>1</sup></b> | 2174740<br>(0.917G + 0.949G)              | 1946867<br>(89.5%)                             | 2726111                           | 0.56            | 20.09            | <b>51480</b><br>b_40339<br>a_1191<br>uc_3275 |
| <b>SIO<sup>2</sup></b> | 2250415<br>(1.1G + 1.2G)                  | 2042199<br>(90.8%)                             |                                   |                 |                  |                                              |

**Table S2.** Bacterial genera added to the list of genera containing oil hydrocarbon degrading organisms proposed by Nölvak et al., 2021.

| <b>Genus</b>         | <b>Class</b>        | <b>Phylum</b>    | <b>Reference</b>     |
|----------------------|---------------------|------------------|----------------------|
| <i>Bermanella</i>    | Gammaproteobacteria | Proteobacteria   | Hu et al., 2017      |
| <i>Dokdonia</i>      | Flavobacteriia      | Bacteroidetes    | Nölvak et al., 2021  |
| <i>Gemmatimonas</i>  | Gemmatimonadetes    | Gemmatimonadetes | Sampaio et al., 2017 |
| <i>Nonlabens</i>     | Flavobacteriia      | Bacteroidetes    | Kwon et al., 2013    |
| <i>Planktomarina</i> | Alphaproteobacteria | Proteobacteria   | Voget et al., 2015   |

**Table S3.** List of targeted hydrocarbon degradation genes with the respective encoded enzymes. In the case of abbreviations unique to this study, KEGG codes are provided in parentheses.

### ALKANES DEGRADATION GENES

|                     |                                                                                      |
|---------------------|--------------------------------------------------------------------------------------|
| <i>alkB1_2/alkM</i> | alkane 1-monooxygenase                                                               |
| <i>almA</i>         | flavin-binding monooxygenase                                                         |
| <i>bmoB</i>         | butane monooxygenase regulatory protein                                              |
| <i>bmoC</i>         | butane monooxygenase regulatory protein                                              |
| <i>bmoD</i>         | butane monooxygenase hypothetical assembly protein<br>(chaperonin-like protein BmoG) |
| <i>bmoX</i>         | butane monooxygenase $\alpha$ subunit                                                |
| <i>bmoY</i>         | butane monooxygenase $\beta$ subunit                                                 |
| <i>bmoZ</i>         | butane monooxygenase $\gamma$ subunit                                                |
| <i>ladA</i>         | long-chain alkane monooxygenase                                                      |
| <i>MAH1</i>         | long-chain alkane monooxygenase                                                      |
| <i>prmA</i>         | propane 2-monooxygenase large subunit                                                |
| <i>prmB</i>         | propane 2-monooxygenase reductase component                                          |
| <i>prmC</i>         | propane 2-monooxygenase small subunit                                                |
| <i>prmD</i>         | propane 2-monooxygenase coupling protein                                             |
| <i>rubB/alkT</i>    | rubredoxin---NAD <sup>+</sup> reductase                                              |

### MONOCYCLIC AROMATIC COMPOUNDS DEGRADATION GENES

|                       |                                                                                         |
|-----------------------|-----------------------------------------------------------------------------------------|
| <i>a-adh</i> (K00055) | aryl-alcohol dehydrogenase                                                              |
| <i>ADH1</i>           | alcohol dehydrogenase class-P                                                           |
| <i>bsdC2</i>          | 4-hydroxybenzoate decarboxylase/phenol carboxylase subunit C                            |
| <i>bsdC1</i>          | vanillate/4-hydroxybenzoate decarboxylase subunit C                                     |
| <i>bsdD</i>           | vanillate/4-hydroxybenzoate decarboxylase subunit D/p-<br>hydroxybenzoate decarboxylase |
| <i>cymAa</i>          | p-cymene methyl-monooxygenase                                                           |
| <i>cymAb</i>          | p-cymene methyl-monooxygenase electron transporter component                            |
| <i>dmpK</i>           | phenol/toluene 2-monooxygenase (NADH) P0/A0 assembly subunit                            |
| <i>dmpL</i>           | phenol/toluene 2-monooxygenase (NADH) P1/A1                                             |
| <i>dmpM</i>           | phenol/toluene 2-monooxygenase (NADH) P2/A2                                             |
| <i>dmpN</i>           | phenol/toluene 2-monooxygenase (NADH) P3/A3                                             |
| <i>dmpO</i>           | phenol/toluene 2-monooxygenase (NADH) P4/A4                                             |
| <i>dmpP</i>           | phenol/toluene 2-monooxygenase (NADH) P5/A5 ferredoxin subunit                          |
| <i>etbAa</i>          | ethylbenzene dioxygenase subunit $\alpha$                                               |
| <i>etbAb</i>          | ethylbenzene dioxygenase subunit $\beta$                                                |
| <i>etbAc</i>          | ethylbenzene dioxygenase ferredoxin component                                           |
| <i>hcaB</i>           | 2,3-dihydroxy-2,3-dihydrophenylpropionate dihydrogenase                                 |
| <i>hcaC</i>           | 3-phenylpropionate/trans-cinnamate dioxygenase ferredoxin component                     |
| <i>hcaD</i>           | 3-phenylpropionate/trans-cinnamate dioxygenase ferredoxin reductase<br>component        |
| <i>hcaE</i>           | 3-phenylpropionate/trans-cinnamate dioxygenase subunit $\alpha$                         |
| <i>hcaF</i>           | 3-phenylpropionate/trans-cinnamate dioxygenase subunit $\beta$                          |
| <i>pchC</i>           | 4-cresol dehydrogenase (hydroxylating) cytochrome subunit                               |

|                     |                                                                          |
|---------------------|--------------------------------------------------------------------------|
| <i>pchF</i>         | 4-cresol dehydrogenase (hydroxylating) flavoprotein subunit              |
| <i>ped</i>          | (s)-1-phenylethanol dehydrogenase                                        |
| <i>phe</i> (K03380) | phenol 2-monooxygenase (NADPH)                                           |
| <i>tmoA</i>         | toluene monooxygenase system protein A                                   |
| <i>tmoB</i>         | toluene monooxygenase system protein B                                   |
| <i>tmoC</i>         | toluene monooxygenase system ferredoxin subunit                          |
| <i>tmoD</i>         | toluene monooxygenase system protein D                                   |
| <i>tmoE</i>         | toluene monooxygenase system protein E                                   |
| <i>tmoF</i>         | toluene monooxygenase electron transfer component                        |
| <i>todA</i>         | benzene/toluene/chlorobenzene dioxygenase ferredoxin reductase component |
| <i>todB</i>         | benzene/toluene/chlorobenzene dioxygenase ferredoxin component           |
| <i>todC1</i>        | benzene/toluene/chlorobenzene dioxygenase subunit $\alpha$               |
| <i>todC2</i>        | benzene/toluene/chlorobenzene dioxygenase subunit $\beta$                |
| <i>xylA</i>         | toluene methyl-monooxygenase electron transporter complex                |
| <i>xylM</i>         | toluene methyl-monooxygenase                                             |
| <i>xylC</i>         | benzaldehyde dehydrogenase (NAD)                                         |

### POLYCYCLIC AROMATIC COMPOUNDS DEGRADATION GENES

|               |                                                                         |
|---------------|-------------------------------------------------------------------------|
| <i>CYP1A1</i> | cytochrome P450 fam. 1 subfam. A1                                       |
| <i>CYP1A2</i> | cytochrome P450 fam. 1 subfam. A2                                       |
| <i>CYP2A6</i> | cytochrome P450 fam. 2 subfamily A6                                     |
| <i>CYP3A4</i> | cytochrome P450 fam. 3 subfam. A4                                       |
| <i>gst</i>    | glutathione s-transferase                                               |
| <i>GSTK1</i>  | glutathione s-transferase kappa 1                                       |
| <i>HPGDS</i>  | prostaglandin-H2 D-isomerase                                            |
| <i>nahB</i>   | cis-1,2-dihydroxynaphthalene/dibenzothiophene dihydrodiol dehydrogenase |
| <i>nahC</i>   | 1,2-dihydroxynaphthalene dioxygenase                                    |
| <i>nidA</i>   | PAH dehydrogenase large subunit                                         |
| <i>nidB</i>   | PAH dehydrogenase small subunit                                         |
| <i>phdK</i>   | 2-formylbenzoate dehydrogenase                                          |

### VARIOUS COMPOUNDS DEGRADATION GENES

|              |                                                                   |
|--------------|-------------------------------------------------------------------|
| <i>adh</i>   | alcohol dehydrogenase                                             |
| <i>adhE</i>  | acetaldehyde dehydrogenase / alcohol dehydrogenase                |
| <i>adhP</i>  | alcohol dehydrogenase propanol-preferring                         |
| <b>ALDH</b>  | aldehyde dehydrogenase (NAD <sup>+</sup> )                        |
| <i>chnB</i>  | cyclohexanone monooxygenase                                       |
| <i>dbfA1</i> | dibenzofuran dioxygenase subunit $\alpha$                         |
| <i>dbfA2</i> | dibenzofuran dioxygenase subunit $\beta$                          |
| <i>frmA</i>  | s-(hydroxymethyl)glutathione dehydrogenase /alcohol dehydrogenase |
| <i>ligA</i>  | protocatechuate 4,5-dioxygenase subunit $\alpha$                  |
| <i>ligB</i>  | protocatechuate 4,5-dioxygenase $\beta$ chain                     |
| <i>nagG</i>  | salicylate 5-hydroxylase large subunit                            |
| <i>nagH</i>  | salicylate 5-hydroxylase small subunit                            |

|                          |                                                            |
|--------------------------|------------------------------------------------------------|
| <i>nahAa</i>             | naphthalene 1,2-dioxygenase ferredoxin reductase component |
| <i>nahAb</i>             | naphthalene 1,2-dioxygenase ferredoxin component           |
| <i>nahAc</i>             | naphthalene 1,2-dioxygenase subunit $\alpha$               |
| <i>nahAd</i>             | naphthalene 1,2-dioxygenase subunit $\beta$                |
| <i>nmsA</i>              | naphtyl-2-methyl-succinate synthase $\alpha$ subunit       |
| <i>nmsB</i>              | naphtyl-2-methyl-succinate synthase $\beta$ subunit        |
| <i>nmsC</i>              | naphtyl-2-methyl-succinate synthase $\gamma$ subunit       |
| <i>pcaG</i>              | protocatechuate 3,4-dioxygenas $\alpha$ subunit            |
| <i>pcaH</i>              | protocatechuate 3,4-dioxygenas $\beta$ subunit             |
| <i>phdI</i>              | 1-hydroxy-2-naphthoate dioxygenase                         |
| <i>phdJ</i>              | 4-(2-carboxyphenyl)-2-oxobut-3-enoate aldolase             |
| <i>phdE</i>              | cis-3,4-dihydrophenanthrene-3,4-diol dehydrogenase         |
| <i>salDH</i><br>(K00480) | salicylate dehydrogenase                                   |
| <i>yiaY</i>              | alcohol dehydrogenase                                      |

#### ANAEROBIC OIL COMPOUNDS DEGRADATION GENES

|                      |                          |
|----------------------|--------------------------|
| <i>benS</i> (K07540) | benzylsuccinate synthase |
|----------------------|--------------------------|

**Table S4.** The proportions (%) of taxonomically assigned sequences at kingdom, phylum (>1%), and class (>1%) level from all sequences of seawater (SW), sea ice (SI), and crude oil encapsulating sea ice (SIO) metagenomes. The proportions (%) at genus (20 most abundant in each sample) level are calculated from all prokaryotic sequences and marked with grey background. Microbial genera shown in bold are genera known to contain hydrocarbon degrading organisms according to the literature. co – cut off value.

| Taxonomic level |                |                     |                             | SW (%) | SI (%) | SIO (%) |
|-----------------|----------------|---------------------|-----------------------------|--------|--------|---------|
| Kingdom         | Phylum         | Class               | Genus                       |        |        |         |
| Bacteria        |                |                     |                             | 66.21  | 78.51  | 74.22   |
|                 | Actinobacteria |                     |                             | 8.50   | 3.35   | 5.67    |
|                 |                |                     | <i>Ca. Actinomarina</i>     | 0.76   | 0.19   | 0.51    |
|                 |                |                     | <i>Ca. Aquiluna</i>         | 0.11   | < co   | < co    |
|                 |                |                     | <i>Streptomyces</i>         | 0.16   | < co   | < co    |
|                 | Bacteroidetes  |                     |                             | 10.24  | 5.39   | 4.86    |
|                 |                |                     | <i>Flavobacterium</i>       | 0.18   | < co   | < co    |
|                 |                |                     | <i>Formosa</i>              | 0.15   | < co   | < co    |
|                 |                |                     | <i>Polaribacter</i>         | 0.11   | < co   | < co    |
|                 |                |                     | <i>Ulvibacter</i>           | 0.10   | < co   | < co    |
|                 | Cyanobacteria  |                     |                             | 1.96   | < co   | < co    |
|                 |                |                     | <i>Synechococcus</i>        | 1.67   | 0.53   | 0.30    |
|                 | Planctomycetes |                     |                             | 2.61   | 1.67   | 1.10    |
|                 | Proteobacteria |                     |                             | 37.86  | 62.75  | 58.26   |
|                 |                | Alphaproteobacteria |                             | 21.29  | 35.40  | 33.92   |
|                 |                |                     | <i>Ca. Endolissoclinum</i>  | 0.35   | 1.32   | 1.15    |
|                 |                |                     | <i>Ca. Pelagibacter</i>     | 4.80   | 10.91  | 9.72    |
|                 |                |                     | <i>Ca. Puniceispirillum</i> | 0.39   | 0.54   | 0.45    |
|                 |                |                     | <i>Octadecabacter</i>       | 0.13   | < co   | < co    |
|                 |                |                     | <i>Asciidiaceihabitans</i>  | < co   | 0.13   | 0.37    |
|                 |                |                     | <i>Planktomarina</i>        | 1.58   | 1.52   | 1.12    |
|                 |                |                     | <i>Roseovarius</i>          | 0.11   | 0.17   | 0.21    |
|                 |                |                     | <i>Ruegeria</i>             | < co   | 0.13   | 0.18    |
|                 |                |                     | <i>Sulfitobacter</i>        | 0.19   | 0.41   | 0.87    |

|              |                 |                      |                          |       |       |       |
|--------------|-----------------|----------------------|--------------------------|-------|-------|-------|
|              |                 |                      | <i>Tateyamaria</i>       | < co  | < co  | 0.17  |
|              |                 | Betaproteobacteria   |                          | 2.93  | 4.36  | 3.57  |
|              |                 |                      | <i>Limnohabitans</i>     | 0.09  | < co  | < co  |
|              |                 |                      | <i>Polynucleobacter</i>  | 0.16  | 0.21  | < co  |
|              |                 | Gammaproteobacteria  |                          | 11.95 | 20.75 | 18.48 |
|              |                 |                      | <i>Alteromonas</i>       | < co  | 0.18  | 0.18  |
|              |                 |                      | <i>Bermanella</i>        | < co  | 0.35  | 0.84  |
|              |                 |                      | <i>Ca. Thioglobus</i>    | 1.06  | 2.60  | 1.71  |
|              |                 |                      | <i>Colwellia</i>         | < co  | 0.37  | 1.74  |
|              |                 |                      | <i>Glaciecola</i>        | < co  | 0.42  | 1.05  |
|              |                 |                      | <i>Marinomonas</i>       | < co  | 0.18  | < co  |
|              |                 |                      | <i>Pseudoalteromonas</i> | < co  | 0.16  | 0.28  |
|              |                 |                      | <i>Pseudomonas</i>       | < co  | 0.26  | 0.29  |
|              |                 |                      | <i>Vibrio</i>            | < co  | 0.14  | 0.19  |
|              |                 | Other Proteobacteria |                          | 1.70  | 2.24  | 2.29  |
|              | Verrucomicrobia |                      |                          | 1.68  | 1.88  | 1.24  |
|              | Other bacteria  |                      |                          | 3.35  | 3.47  | 3.10  |
| Archaea      |                 |                      |                          | 4.33  | 1.16  | 1.39  |
|              |                 |                      | <i>Nitrosopumilus</i>    | 0.09  | < co  | < co  |
| Unclassified |                 |                      |                          | 29.46 | 20.32 | 24.39 |

**Table S5.** The proportions (%) of sequencing of 20 most abundant prokaryotic genera known to contain hydrocarbon degrading organisms from prokaryotic sequences in metagenomes of seawater (SW), sea ice (SI), and crude oil encapsulating sea ice (SIO). co – cut off value.

| <b>Genus</b>             | <b>SW</b>   | <b>SI</b>   | <b>SIO</b>   |
|--------------------------|-------------|-------------|--------------|
| <i>Alteromonas</i>       | < co        | 0.098       | 0.18         |
| <i>Bacillus</i>          | 0.080       | < co        | 0.091        |
| <i>Bermanella</i>        | < co        | 0.35        | 0.84         |
| <i>Bradyrhizobium</i>    | 0.070       | 0.097       | 0.093        |
| <i>Colwellia</i>         | < co        | 0.37        | 1.74         |
| <i>Flavobacterium</i>    | 0.18        | 0.098       | < co         |
| <i>Glaciecola</i>        | < co        | 0.42        | 1.05         |
| <i>Legionella</i>        | 0.071       | < co        | < co         |
| <i>Maribacter</i>        | 0.068       | < co        | < co         |
| <i>Marinomonas</i>       | < co        | 0.18        | 0.11         |
| <i>Mesorhizobium</i>     | 0.08        | 0.10        | 0.11         |
| <i>Oleispira</i>         | < co        | 0.10        | 0.10         |
| <i>Paracoccus</i>        | 0.060       | < co        | < co         |
| <i>Paraglaciecola</i>    | < co        | < co        | 0.097        |
| <i>Planktomarina</i>     | 1.58        | 1.52        | 1.11         |
| <i>Polaribacter</i>      | 0.11        | < co        | < co         |
| <i>Pseudoalteromonas</i> | 0.081       | 0.16        | 0.28         |
| <i>Pseudomonas</i>       | 0.20        | 0.27        | 0.29         |
| <i>Rhizobium</i>         | 0.058       | < co        | < co         |
| <i>Rhodobacter</i>       | 0.072       | 0.090       | < co         |
| <i>Roseobacter</i>       | < co        | 0.082       | 0.13         |
| <i>Roseovarius</i>       | 0.11        | 0.17        | 0.21         |
| <i>Ruegeria</i>          | 0.087       | 0.13        | 0.18         |
| <i>Shewanella</i>        | < co        | < co        | 0.093        |
| <i>Sphingomonas</i>      | 0.073       | 0.092       | < co         |
| <i>Streptomyces</i>      | 0.16        | 0.11        | 0.11         |
| <i>Sulfitobacter</i>     | 0.19        | 0.41        | 0.87         |
| <i>Ulvibacter</i>        | 0.10        | < co        | < co         |
| <i>Vibrio</i>            | 0.10        | 0.14        | 0.19         |
| <b>Total proportion</b>  | <b>7.11</b> | <b>9.35</b> | <b>12.16</b> |



**Table S6.** Normalized counts (RPKG) of genes associated with alkanes degradation in metagenomes of seawater (SW), sea ice (SI), and crude oil encapsulating sea ice (SIO). The names of respective encoded enzymes can be found in Table S3. Genes encoding multiple subunits of one enzyme are shaded with gray background. \* The genes encoding subunits for electron transport and showing remarkably higher counts compared to the genes encoding other subunits of the same enzyme were not included in the analysis.

**Table S7.** Normalized counts of genes (RPKG) related to the degradation of monocyclic aromatic hydrocarbons (MAHs) in metagenomes of seawater (SW), sea ice (SI), and sea ice encapsulating crude oil (SIO). The names of the respective enzymes or their subunits encoded by these genes can be found in Table S3. The genes encoding multiple subunits of the enzyme are shaded with gray background. \* The genes encoding subunits for electron transport and showing remarkably higher counts compared to the genes encoding other subunits of the same enzyme were not included in the analysis.

| MONOCYCLYC AROMATIC COMPOUNDS DEGRADATION GENES          |       |      |      |                       |             |             |             |             |              |               |             |             |             |             |             |              |              |              |              |             |              |              |             |             |             |             |            |                     |             |             |              |             |             |              |             |             |              |              |             |             |             |
|----------------------------------------------------------|-------|------|------|-----------------------|-------------|-------------|-------------|-------------|--------------|---------------|-------------|-------------|-------------|-------------|-------------|--------------|--------------|--------------|--------------|-------------|--------------|--------------|-------------|-------------|-------------|-------------|------------|---------------------|-------------|-------------|--------------|-------------|-------------|--------------|-------------|-------------|--------------|--------------|-------------|-------------|-------------|
|                                                          | SW    | SI   | SIO  | <i>a-adh</i> (K00055) | <i>ADH1</i> | <i>bsdC</i> | <i>bsdC</i> | <i>bsdD</i> | <i>cymAa</i> | <i>*cymAb</i> | <i>dmpK</i> | <i>dmpL</i> | <i>dmpM</i> | <i>dmpN</i> | <i>dmpO</i> | <i>*dmpP</i> | <i>etbAa</i> | <i>etbAb</i> | <i>etbAc</i> | <i>hcaB</i> | <i>*hcaC</i> | <i>*hcaD</i> | <i>hcaE</i> | <i>hcaF</i> | <i>pchC</i> | <i>pchF</i> | <i>ped</i> | <i>phe</i> (K03380) | <i>tmoA</i> | <i>tmoB</i> | <i>*tmoC</i> | <i>tmoD</i> | <i>tmoE</i> | <i>*tmoF</i> | <i>todA</i> | <i>todB</i> | <i>todC1</i> | <i>todC2</i> | <i>xyIA</i> | <i>xyIM</i> | <i>xyIC</i> |
|                                                          | 5.09  | 6.08 | 5.01 | 2.06                  | 2.67        | 0.42        | 0.74        | 0           | 0.28         | 1.38          | 0           | 0.02        | 0           | 0.04        | 0           | 2.57         | 1.16         | 0            | 0.97         | 21.4        | 3.63         | 4.34         | 1.32        | 0           | 0           | 0.95        | 20.4       | 0.71                | 0.04        | 0           | 3.74         | 0           | 0           | 2.83         | 1.48        | 0.72        | 0.81         | 0            | 2.23        | 0.31        | 8.03        |
| Average counts of genes encoding subunits of the enzymes |       |      |      |                       |             |             |             |             |              |               |             |             |             |             |             |              |              |              |              |             |              |              |             |             |             |             |            |                     |             |             |              |             |             |              |             |             |              |              |             |             |             |
| SW                                                       | -     | -    | -    | 0.19                  | 0.41        | 0.03        |             |             | 1.32         |               |             | -           | 1.05        |             |             | 0.49         | -            | -            | 0.05         |             |              | 1.05         |             |             | 1.19        | -           |            |                     |             |             |              |             |             |              |             |             |              |              |             |             |             |
| SI                                                       | -     | -    | -    | 0.37                  | 0.30        | 0.02        |             |             | 1.40         |               |             | -           | 1.24        |             |             | 0.67         | -            | -            | 0.05         |             |              | 1.12         |             |             | 1.14        | -           |            |                     |             |             |              |             |             |              |             |             |              |              |             |             |             |
| SIO                                                      | -     | -    | -    | 0.11                  | 0.28        | 0.01        |             |             | 0.71         |               |             | -           | 0.66        |             |             | 0.48         | -            | -            | 0.01         |             |              | 0.75         |             |             | 1.27        | -           |            |                     |             |             |              |             |             |              |             |             |              |              |             |             |             |
| Summarized counts of all genes                           |       |      |      |                       |             |             |             |             |              |               |             |             |             |             |             |              |              |              |              |             |              |              |             |             |             |             |            |                     |             |             |              |             |             |              |             |             |              |              |             |             |             |
| SW                                                       | 44.44 |      |      |                       |             |             |             |             |              |               |             |             |             |             |             |              |              |              |              |             |              |              |             |             |             |             |            |                     |             |             |              |             |             |              |             |             |              |              |             |             |             |
| SI                                                       | 50.33 |      |      |                       |             |             |             |             |              |               |             |             |             |             |             |              |              |              |              |             |              |              |             |             |             |             |            |                     |             |             |              |             |             |              |             |             |              |              |             |             |             |
| SIO                                                      | 40.77 |      |      |                       |             |             |             |             |              |               |             |             |             |             |             |              |              |              |              |             |              |              |             |             |             |             |            |                     |             |             |              |             |             |              |             |             |              |              |             |             |             |



**Table S9.** Normalized counts of genes (RPKG) associated with various types of hydrocarbons degradation in metagenomes of seawater (SW), sea ice (SI), and sea ice encapsulating crude oil (SIO) metagenomes. The names of the enzymes and enzyme subunits encoded by these genes can be found in Table S3. Genes encoding multiple subunits of the enzyme are shaded with gray background. \* The genes encoding subunits for electron transport and showing remarkably higher counts compared to the genes encoding other subunits of the same enzyme were not included in the analysis.

| VARIOUS COMPOUNDS DEGRADATION GENES (RPKG)               |            |             |             |      |             |              |              |             |             |             |             |             |               |               |              |              |             |             |             |             |             |             |             |             |                       |             |
|----------------------------------------------------------|------------|-------------|-------------|------|-------------|--------------|--------------|-------------|-------------|-------------|-------------|-------------|---------------|---------------|--------------|--------------|-------------|-------------|-------------|-------------|-------------|-------------|-------------|-------------|-----------------------|-------------|
|                                                          | <i>adh</i> | <i>adhE</i> | <i>adhP</i> | ALDH | <i>chnB</i> | <i>dbfA1</i> | <i>dbfA2</i> | <i>frmA</i> | <i>ligA</i> | <i>ligB</i> | <i>nagG</i> | <i>nagH</i> | <i>*nahAa</i> | <i>*nahAb</i> | <i>nahAc</i> | <i>nahAd</i> | <i>nmsA</i> | <i>nmsB</i> | <i>nmsC</i> | <i>pcaG</i> | <i>pcaH</i> | <i>phdI</i> | <i>phdJ</i> | <i>phdE</i> | <i>salDH</i> (K00480) | <i>viaY</i> |
| SW                                                       | 6.67       | 2.30        | 5.46        | 4.86 | 1.47        | 1.65         | 0.15         | 2.62        | 0.19        | 0.10        | 1.88        | 0           | 2.64          | 3.23          | 1.47         | 0            | 0           | 0           | 0           | 0.61        | 0.28        | 0.18        | 0.93        | 10.7        | 2.41                  | 1.07        |
| SI                                                       | 8.04       | 2.57        | 6.65        | 4.83 | 2.04        | 1.91         | 0.29         | 3.25        | 0.32        | 0.40        | 2.13        | 0.31        | 2.65          | 2.75          | 1.78         | 0.55         | 0           | 0           | 0           | 0.87        | 0.42        | 0.38        | 0.92        | 12.7        | 2.95                  | 1.43        |
| SIO                                                      | 6.36       | 2.55        | 5.38        | 4.99 | 1.60        | 0.96         | 0            | 2.52        | 0.29        | 0.27        | 1.28        | 0.12        | 2.92          | 1.84          | 0.88         | 0            | 0           | 0           | 0           | 0.70        | 0.27        | 0.03        | 0.87        | 9.53        | 2.44                  | 1.17        |
| Average counts of genes encoding subunits of the enzymes |            |             |             |      |             |              |              |             |             |             |             |             |               |               |              |              |             |             |             |             |             |             |             |             |                       |             |
| SW                                                       | -          | -           | -           | -    | -           | 0.9          | -            | 0.15        | 0.94        | 0.36        |             |             | 0             |               |              | 0.45         |             | 0.56        |             | -           |             | -           |             | -           |                       |             |
| SI                                                       | -          | -           | -           | -    | -           | 1.1          | -            | 0.36        | 1.22        | 1.17        |             |             | 0             |               |              | 0.65         |             | 0.65        |             | -           |             | -           |             | -           |                       |             |
| SIO                                                      | -          | -           | -           | -    | -           | 0.48         | -            | 0.28        | 0.70        | 0.44        |             |             | 0             |               |              | 0.49         |             | 0.45        |             | -           |             | -           |             | -           |                       |             |
| Summarized counts all genes                              |            |             |             |      |             |              |              |             |             |             |             |             |               |               |              |              |             |             |             |             |             |             |             |             |                       |             |
| SW                                                       | 40.92      |             |             |      |             |              |              |             |             |             |             |             |               |               |              |              |             |             |             |             |             |             |             |             |                       |             |
| SI                                                       | 49.61      |             |             |      |             |              |              |             |             |             |             |             |               |               |              |              |             |             |             |             |             |             |             |             |                       |             |
| SIO                                                      | 39.38      |             |             |      |             |              |              |             |             |             |             |             |               |               |              |              |             |             |             |             |             |             |             |             |                       |             |

**Table S10.** Normalized counts (RPKG) of the sequences of prokaryotic genera associated with the genes or gene clusters from alkanes degradation gene group. The associations are based on the affiliation of contigs containing sequences of respective genes in seawater (SW), sea ice (SI), and crude oil encapsulating sea ice (SIO) metagenomes.

| Phylum/class        | Genus                       | Gene/gene cluster | Normalized counts |      |     |
|---------------------|-----------------------------|-------------------|-------------------|------|-----|
|                     |                             |                   | SW                | SI   | SIO |
| Alphaproteobacteria | <i>Octadecabacter</i>       | <i>alkB1_2</i>    | 0.66              | –    | –   |
|                     | <i>Planktomarina</i>        |                   | 1.32              | 1.10 | 1   |
|                     | <i>Rhodobacter</i>          |                   | 0.66              | –    | –   |
|                     | <i>Sulfitobacter</i>        |                   | –                 | 0.55 | –   |
|                     | <i>Tateyamaria</i>          |                   | 0.66              | –    | –   |
| Gammaproteobacteria | <i>Bermanella</i>           |                   | –                 | 1.10 | 3   |
|                     | <i>Endozoicomonas</i>       |                   | –                 | –    | 1   |
|                     | <i>Methylophaga</i>         |                   | 0.66              | –    | –   |
|                     | <i>Oleispira</i>            |                   | –                 | 0.55 | 1   |
|                     | <i>Reinekea</i>             |                   | –                 | 0.55 | –   |
| Actinobacteria      | <i>Acidimicrobium</i>       |                   | –                 | 0.55 | –   |
| Bacteroidetes       | <i>Altibacter</i>           |                   | 0.66              | –    | –   |
|                     | <i>Kordia</i>               |                   | –                 | 0.55 | –   |
|                     | <i>Winogradskyella</i>      |                   | –                 | 0.55 | –   |
| Alphaproteobacteria | <i>Bradyrhizobium</i>       | <i>almA</i>       | 1.32              | 1.10 | –   |
|                     | <i>Ca. Pelagibacter</i>     |                   | 4.64              | 2.76 | 2   |
|                     | <i>Sphingomonas</i>         |                   | 0.66              | 0.55 | –   |
|                     | <i>Hyphomonas</i>           |                   | 0.66              | 0.55 | –   |
|                     | <i>Ca. Puniceispirillum</i> |                   | 0.66              | –    | –   |
|                     | <i>Thalassobaculum</i>      |                   | 0.66              | –    | –   |
|                     | <i>Reyranella</i>           |                   | 0.66              | –    | –   |
|                     | <i>Sulfitobacter</i>        |                   | 0.66              | –    | –   |
|                     | <i>Phaeobacter</i>          |                   | –                 | 0.55 | –   |
|                     | <i>Pacificimonas</i>        |                   | –                 | 0.55 | –   |
|                     | <i>Henriciella</i>          |                   | –                 | 0.55 | –   |
|                     | <i>Planktotalea</i>         |                   | –                 | –    | 1   |
| Betaproteobacteria  | <i>Ca. Methylopumilus</i>   |                   | 0.66              | –    | –   |
| Deltaproteobacteria | <i>Sandaracinus</i>         |                   | –                 | –    | 1   |
| Gammaproteobacteria | <i>Marinobacter</i>         |                   | 0.66              | –    | –   |
|                     | <i>Glaciecola</i>           |                   | –                 | 0.55 | 1   |
|                     | <i>Ca. Thioglobus</i>       |                   | 0.66              | 0.55 | 1   |
|                     | <i>Umboniibacter</i>        |                   | 0.66              | 0.55 | –   |
|                     | <i>Shewanella</i>           |                   | –                 | 0.55 | –   |
|                     | <i>Pseudomonas</i>          |                   | –                 | 0.55 | –   |
|                     | <i>Bermanella</i>           |                   | –                 | –    | 2   |
|                     | <i>Thalassotalea</i>        |                   | –                 | –    | 1   |
| Actinobacteria      | <i>Ilumatobacter</i>        |                   | –                 | –    | 1   |
|                     | <i>Nocardioides</i>         |                   | 0.66              | –    | –   |
|                     | <i>Jatrophihabitans</i>     |                   | 0.66              | –    | –   |
|                     | <i>Nocardia</i>             |                   | 0.66              | –    | –   |
|                     | <i>Streptomonospora</i>     |                   | 0.66              | 0.55 | –   |
|                     | <i>Streptomyces</i>         |                   | 0.66              | –    | –   |

| Phylum/class        | Genus                    | Gene/gene cluster | Normalized counts |      |     |
|---------------------|--------------------------|-------------------|-------------------|------|-----|
|                     |                          |                   | SW                | SI   | SIO |
| Actinobacteria      | <i>Saccharopolyspora</i> | <i>almA</i>       | 0.66              | 0.55 | –   |
|                     | <i>Nonomuraea</i>        |                   | 0.66              | 0.55 | –   |
|                     | <i>Cellulomonas</i>      |                   | 0.66              | –    | –   |
| Cyanobacteria       | <i>Trichodesmium</i>     |                   | –                 | 0.55 | –   |
| Firmicutes          | <i>Bacillus</i>          |                   | –                 | 1.10 | 1   |
| Gammaproteobacteria | <i>Ca. Thioglobus</i>    | <i>bmoBCDXYZ</i>  | 0.66              | 1.10 | –   |
| Alphaproteobacteria | <i>Planktomarina</i>     | <i>ladA</i>       | 0.66              | 0.55 | 1   |
|                     | <i>Roseicyclus</i>       |                   | 0.66              | 0.55 | –   |
|                     | <i>Belnapia</i>          |                   | 0.66              | –    | –   |
|                     | <i>Planktotalea</i>      |                   | 0.66              | –    | –   |
|                     | <i>Reyranella</i>        |                   | 0.66              | –    | –   |
|                     | <i>Aureimonas</i>        |                   | –                 | 0.55 | –   |
|                     | <i>Rhodoplanes</i>       |                   | –                 | 0.55 | –   |
|                     | <i>Jannaschia</i>        |                   | –                 | 0.55 | –   |
|                     | <i>Enhydrobacter</i>     |                   | –                 | 0.55 | –   |
|                     | <i>Sulfitobacter</i>     |                   | –                 | –    | 1   |
|                     | <i>Azospirillum</i>      |                   | –                 | –    | 1   |
| Gammaproteobacteria | <i>Microbulbifer</i>     |                   | –                 | 0.55 | –   |
| Actinobacteria      | <i>Mycolicibacterium</i> |                   | –                 | 0.55 | –   |
| Firmicutes          | <i>Bacillus</i>          |                   | –                 | 0.55 | –   |
| Alphaproteobacteria | <i>Ascidiahabitans</i>   | <i>MAH1</i>       | 1.32              | 1.10 | 1   |
|                     | <i>Planktomarina</i>     |                   | 0.66              | 0.55 | 1   |
|                     | <i>Roseobacter</i>       |                   | 0.66              | –    | –   |
|                     | <i>Sulfitobacter</i>     |                   | 0.66              | 0.55 | –   |
| Cyanobacteria       | <i>Bellilinea</i>        |                   | 0.66              | –    | –   |
|                     | <i>Synechococcus</i>     |                   | 0.66              | 0.55 | –   |
| Firmicutes          | <i>Paenibacillus</i>     |                   | 0.66              | 0.55 | –   |
| Gammaproteobacteria | <i>Ca. Thioglobus</i>    | <i>prmABCD</i>    | 1.32              | 1.10 | 1   |

**Table S11.** The normalized counts (RPKG) of the sequences of top100 prokaryotic genera associated with the genes and gene clusters from monocyclic aromatic hydrocarbons degradation gene group. The associations are based on the affiliation of the contigs containing sequences of respective genes in the seawater (SW), sea ice (SI), and crude oil encapsulating sea ice (SIO) metagenomes. Archaea are given on green background.

| Phylum/class        | Genus                 | Gene/gene cluster | Normalized counts |      |     |
|---------------------|-----------------------|-------------------|-------------------|------|-----|
|                     |                       |                   | SW                | SI   | SIO |
| Gammaproteobacteria | <i>Bermanella</i>     | <i>bsdC2</i>      | –                 | 1.10 | 1   |
|                     | <i>Colwellia</i>      |                   | –                 | –    | 2   |
|                     | <i>Glaciecola</i>     |                   | –                 | 0.55 | 2   |
|                     | <i>Methylophaga</i>   |                   | 0.66              | 0.55 | 1   |
| Cyanobacteria       | <i>Synechococcus</i>  |                   | 3.31              | –    | –   |
| Thaumarchaeota      | <i>Nitrosopumilus</i> |                   | 1.32              | 1.66 | –   |
| Gammaproteobacteria | <i>Methylophaga</i>   | <i>bsdC1D</i>     | 0.66              | 0.55 | 1   |
|                     | <i>Bermanella</i>     |                   | –                 | 1.10 | 1   |
|                     | <i>Colwellia</i>      |                   | –                 | 0    | 2   |

| Phylum/class        | Genus                       | Gene/gene cluster | Normalized counts |      |     |
|---------------------|-----------------------------|-------------------|-------------------|------|-----|
|                     |                             |                   | SW                | SI   | SIO |
|                     | <i>Glaciecola</i>           |                   | –                 | 0.55 | 2   |
| Cyanobacteria       | <i>Synechococcus</i>        |                   | 3.97              | –    | –   |
| Thaumarchaeota      | <i>Ca. Nitrosomarinus</i>   |                   | 0.66              | –    | 1   |
|                     | <i>Nitrosopumilus</i>       |                   | 1.32              | 1.66 | –   |
| Alphaproteobacteria | <i>Planktomarina</i>        | <i>cymAab</i>     | 0.66              | 0.55 | 1   |
| Gammaproteobacteria | <i>Bermanella</i>           |                   | –                 | –    | 2   |
|                     | <i>Oleispira</i>            |                   | –                 | 0.55 | 1   |
| Gammaproteobacteria | <i>Ca. Thioglobus</i>       | <i>dmpKLMNOP</i>  | 0.66              | 1.10 | 1   |
| Alphaproteobacteria | <i>Ca. Pelagibacter</i>     | <i>etpAabc</i>    | –                 | 1.66 | 2   |
|                     | <i>Ca. Puniceispirillum</i> |                   | 3.31              | 3.31 | 1   |
|                     | <i>Planktomarina</i>        |                   | 3.97              | 2.21 | 2   |
|                     | <i>Pseudooceanicola</i>     |                   | 0.66              | 0.55 | 1   |
|                     | <i>Pseudophaeobacter</i>    |                   | –                 | 0.55 | 1   |
|                     | <i>Roseovarius</i>          |                   | 0.66              | 1.10 | –   |
| Gammaproteobacteria | <i>Ca. Thioglobus</i>       |                   | 7.28              | 9.39 | 4   |
| Firmicutes          | <i>Bacillus</i>             |                   | –                 | 1.10 | 1   |
| Alphaproteobacteria | <i>Ca. Pelagibacter</i>     | <i>hcaCDEF</i>    | 5.30              | 4.42 | 7   |
|                     | <i>Ca. Puniceispirillum</i> |                   | 3.31              | 3.31 | 1   |
|                     | <i>Planktomarina</i>        |                   | 3.97              | 2.21 | 2   |
|                     | <i>Pseudooceanicola</i>     |                   | 0.66              | 0.55 | 1   |
|                     | <i>Pseudophaeobacter</i>    |                   | –                 | 0.55 | 1   |
|                     | <i>Roseovarius</i>          |                   | 0.66              | 1.10 | –   |
| Gammaproteobacteria | <i>Ca. Thioglobus</i>       |                   | 7.28              | 9.94 | 5   |
| Cyanobacteria       | <i>Synechococcus</i>        |                   | 1.99              | –    | –   |
| Firmicutes          | <i>Bacillus</i>             |                   | –                 | 1.10 | 1   |
| Alphaproteobacteria | <i>Ca. Pelagibacter</i>     | <i>pchCF</i>      | 3.31              | 2.76 | 1   |
|                     | <i>Emcibacter</i>           |                   | 0.66              | 0.55 | 1   |
|                     | <i>Planktomarina</i>        |                   | 3.97              | 3.31 | 2   |
|                     | <i>Roseobacter</i>          |                   | 0.66              | –    | 1   |
|                     | <i>Salipiger</i>            |                   | 0.66              | 0.55 | 1   |
|                     | <i>Sulfitobacter</i>        |                   | –                 | 0.55 | 1   |
| Betaproteobacteria  | <i>Variovorax</i>           |                   | 0.66              | 1.10 | –   |
| Gammaproteobacteria | <i>Bermanella</i>           |                   | –                 | 0.55 | 1   |
|                     | <i>Ca. Thioglobus</i>       |                   | 1.32              | 6.63 | 10  |
|                     | <i>Glaciecola</i>           |                   | –                 | 0.55 | 1   |
|                     | <i>Pseudomonas</i>          |                   | 0.66              | 0.55 | 1   |
| Cyanobacteria       | <i>Synechococcus</i>        |                   | 3.31              | 0.55 | –   |
| Gammaproteobacteria | <i>Ca. Thioglobus</i>       | <i>tmoABCDEF</i>  | 1.32              | 1.10 | 1   |
| Alphaproteobacteria | <i>Ca. Pelagibacter</i>     | <i>todABC1C2</i>  | 4.64              | 3.31 | 7   |
|                     | <i>Ca. Puniceispirillum</i> |                   | 2.65              | 1.66 | 1   |
|                     | <i>Planktomarina</i>        |                   | 3.97              | 2.21 | 2   |
|                     | <i>Pseudophaeobacter</i>    |                   | –                 | 0.55 | 1   |
|                     | <i>Roseovarius</i>          | <i>todABC1C2</i>  | 0.66              | 1.10 | –   |
| Gammaproteobacteria | <i>Ca. Thioglobus</i>       |                   | 5.96              | 7.73 | 3   |
| Firmicutes          | <i>Bacillus</i>             |                   | –                 | 1.10 | 1   |

| Phylum/class        | Genus                       | Gene/gene cluster | Normalized counts |       |     |
|---------------------|-----------------------------|-------------------|-------------------|-------|-----|
|                     |                             |                   | SW                | SI    | SIO |
| Alphaproteobacteria | <i>Planktomarina</i>        | <i>xylAM</i>      | 0.66              | 0.55  | 1   |
| Gammaproteobacteria | <i>Bermanella</i>           |                   | —                 | 0.55  | 2   |
|                     | <i>Oleispira</i>            |                   | —                 | 0.55  | 1   |
| Alphaproteobacteria | <i>Antarctobacter</i>       | <i>xylC</i>       | —                 | 0.55  | 1   |
|                     | <i>Asciidiaceihabitans</i>  |                   | 1.99              | 2.76  | 1   |
|                     | <i>Ca. Pelagibacter</i>     |                   | 40.40             | 46.41 | 65  |
|                     | <i>Ca. Puniceispirillum</i> |                   | 3.97              | 4.42  | 1   |
|                     | <i>Cohaesibacter</i>        |                   | 0.66              | —     | 1   |
|                     | <i>Fluviibacterium</i>      |                   | —                 | 0.55  | 1   |
|                     | <i>Kiloniella</i>           |                   | 0.66              | 1.10  | —   |
|                     | <i>Leisingera</i>           |                   | 0.66              | 2.21  | 3   |
|                     | <i>Lentibacter</i>          |                   | 0.66              | 1.10  | 1   |
|                     | <i>Litoreibacter</i>        |                   | 0.66              | 2.21  | —   |
|                     | <i>Maritalea</i>            |                   | 0.66              | 1.10  | 1   |
|                     | <i>Octadecabacter</i>       |                   | 1.32              | 1.10  | —   |
|                     | <i>Pelagicola</i>           |                   | —                 | 0.55  | 1   |
|                     | <i>Planktomarina</i>        |                   | 18.54             | 14.92 | 25  |
|                     | <i>Pseudorhodobacter</i>    |                   | 1.32              | 0.55  | —   |
|                     | <i>Rhodovulum</i>           |                   | 0.66              | —     | 1   |
|                     | <i>Roseobacter</i>          |                   | 1.32              | 0.55  | 1   |
|                     | <i>Roseovarius</i>          |                   | 0.66              | —     | 4   |
|                     | <i>Ruegeria</i>             |                   | 3.31              | —     | —   |
|                     | <i>Salinihabitans</i>       |                   | 0.66              | —     | 1   |
|                     | <i>Shimia</i>               |                   | 1.32              | 0.55  | —   |
|                     | <i>Sphingomonas</i>         |                   | —                 | 2.21  | 1   |
|                     | <i>Sulfitobacter</i>        |                   | 4.64              | 4.97  | 4   |
|                     | <i>Thalassobium</i>         |                   | 1.32              | 1.10  | —   |
|                     | <i>Xanthobacter</i>         |                   | 0.66              | 0.55  | 1   |
|                     | <i>Yoonia</i>               |                   | 1.99              | 1.10  | —   |
| Betaproteobacteria  | <i>Collimonas</i>           |                   | —                 | 0.55  | 1   |
| Epsilon             | <i>Arcobacter</i>           |                   | —                 | —     | 2   |
| Gammaproteobacteria | <i>Alteromonas</i>          |                   | —                 | 0.55  | 1   |
|                     | <i>Amphritea</i>            |                   | 0.66              | 0.55  | 1   |
|                     | <i>Bermanella</i>           |                   | —                 | 2.21  | 8   |
|                     | <i>Ca. Thioglobus</i>       |                   | 13.91             | 20.44 | 17  |
|                     | <i>Colwellia</i>            |                   | —                 | 1.10  | 19  |
|                     | <i>Glaciecola</i>           |                   | —                 | 2.76  | 5   |
|                     | <i>Halioglobus</i>          |                   | 2.65              | 1.10  | 1   |
|                     | <i>Moritella</i>            |                   | —                 | 0.55  | 1   |
|                     | <i>Oceanospirillum</i>      |                   | —                 | —     | 2   |
|                     | <i>Paraglaciecola</i>       |                   | —                 | —     | 2   |
|                     | <i>Pseudoalteromonas</i>    |                   | —                 | 0.55  | 3   |
|                     | <i>Pseudomonas</i>          |                   | 1.99              | 1.66  | 1   |
|                     | <i>Rheinheimera</i>         |                   | 0                 | 0.55  | 1   |
|                     | <i>Salinicola</i>           |                   | 0.66              | 1.66  | —   |
| Actinobacteria      | <i>Ca. Aquiluna</i>         |                   | 4.64              | 1.66  | —   |



| Phylum/class  | Genus                | Gene/gene cluster | Normalized counts |      |     |
|---------------|----------------------|-------------------|-------------------|------|-----|
|               |                      |                   | SW                | SI   | SIO |
| Bacteroidetes | <i>Clavibacter</i>   |                   | –                 | 0.55 | 1   |
|               | <i>Pontimonas</i>    |                   | –                 | 0.55 | 1   |
|               | <i>Chryseolinea</i>  |                   | 0.66              | 1.10 | –   |
|               | <i>Polaribacter</i>  |                   | 0.66              | 0.55 | 1   |
| Cyanobacteria | <i>Synechococcus</i> |                   | 4.64              | 0.55 | –   |

**Table S12.** Normalized counts (RPKG) of sequences of prokaryotic genera associated with genes and gene clusters from polycyclic aromatic hydrocarbons degradation gene group. The associations are based on the affiliation of contigs containing sequences of respective genes in seawater (SW), sea ice (SI), and crude poil encapsulating sea ice (SIO) metagenomes.

| Phylum/class        | Genus                      | Gene     | Normalized counts |      |     |
|---------------------|----------------------------|----------|-------------------|------|-----|
|                     |                            |          | SW                | SI   | SIO |
| Alphaproteobacteria | <i>Agrobacterium</i>       | CYP1A1A2 | –                 | 0.55 | –   |
|                     | <i>Aliiroseovarius</i>     |          | –                 | 0.55 | –   |
|                     | <i>Asciidiaceihabitans</i> |          | –                 | 1.66 | 1   |
|                     | <i>Labrenzia</i>           |          | –                 | 0.55 | –   |
|                     | <i>Novosphingobium</i>     |          | –                 | 0.55 | –   |
|                     | <i>Phenylobacterium</i>    |          | –                 | 0.55 | –   |
|                     | <i>Planktomarina</i>       |          | 2.65              | 2.21 | 2   |
|                     | <i>Rhodobacter</i>         |          | –                 | 0.55 | 1   |
|                     | <i>Roseobacter</i>         |          | 0.66              | –    | –   |
|                     | <i>Sulfitobacter</i>       |          | –                 | 0.55 | –   |
|                     | <i>Tateyamaria</i>         |          | 0.66              | –    | –   |
| Betaproteobacteria  | <i>Massilia</i>            | CYP1A1A2 | –                 | 0.55 | –   |
| Deltaproteobacteria | <i>Hyalangium</i>          |          | 0.66              | –    | –   |
| Gammaproteobacteria | <i>Alteromonas</i>         |          | –                 | 0.55 | –   |
|                     | <i>Halioglobus</i>         |          | 1.32              | 0.55 | –   |
|                     | <i>Marinobacter</i>        |          | –                 | –    | 1   |
|                     | <i>Marortus</i>            |          | –                 | 0.55 | –   |
|                     | <i>Photobacterium</i>      |          | –                 | –    | 1   |
|                     | <i>Pseudohalaea</i>        |          | 0.66              | –    | –   |
| Actinobacteria      | <i>Ca. Actinomarina</i>    |          | 0.66              | –    | –   |
|                     | <i>Nakamurella</i>         |          | 0.66              | –    | –   |
| Chloroflexi         | <i>Bellilinea</i>          |          | 0.66              | –    | –   |
| Cyanobacteria       | <i>Synechococcus</i>       |          | 3.31              | 1.10 | –   |
| Firmicutes          | <i>Paenibacillus</i>       |          | –                 | 1.10 | –   |
| Verrucomicrobiae    | <i>Verrucomicrobium</i>    |          | 0.66              | –    | –   |
| Alphaproteobacteria | <i>Asciidiaceihabitans</i> | CYP2A6   | –                 | 0.55 | 1   |
|                     | <i>Planktomarina</i>       |          | 0.66              | 0.55 | 1   |
|                     | <i>Roseobacter</i>         |          | 0.66              | –    | –   |
| Chloroflexi         | <i>Bellilinea</i>          |          | 0.66              | –    | –   |
| Firmicutes          | <i>Paenibacillus</i>       | CYP3A4   | –                 | 0.55 | –   |
| Alphaproteobacteria | <i>Asciidiaceihabitans</i> |          | –                 | 1.10 | 1   |
|                     | <i>Planktomarina</i>       |          | 0.66              | 0.55 | 1   |
|                     | <i>Roseobacter</i>         |          | 0.66              | –    | –   |

| Phylum/class        | Genus                      | Gene         | Normalized counts |      |     |
|---------------------|----------------------------|--------------|-------------------|------|-----|
|                     |                            |              | SW                | SI   | SIO |
|                     | <i>Sulfitobacter</i>       |              | –                 | 0.55 | –   |
| Actinobacteria      | <i>Nakamurella</i>         |              | 0.66              | –    | –   |
| Chloroflexi         | <i>Bellilinea</i>          |              | 0.66              | –    | –   |
| Cyanobacteria       | <i>Synechococcus</i>       |              | 2.65              | 1.10 | –   |
| Firmicutes          | <i>Paenibacillus</i>       |              | –                 | 0.55 | –   |
| Alphaproteobacteria | <i>Ca. Pelagibacter</i>    | <i>GSTK1</i> | 1.32              | 1.10 | 2   |
|                     | <i>Gemmobacter</i>         |              | –                 | 0.55 | –   |
|                     | <i>Planktomarina</i>       |              | 1.32              | 0.55 | 1   |
|                     | <i>Pseudochrobactrum</i>   |              | 0.66              | –    | –   |
|                     | <i>Rhodoligotrophos</i>    |              | –                 | 0.55 | –   |
|                     | <i>Sphingobium</i>         |              | 0.66              | –    | –   |
| Betaproteobacteria  | <i>Cupriavidus</i>         |              | –                 | 0.55 | 1   |
| Gammaproteobacteria | <i>Bermanella</i>          |              | –                 | –    | 1   |
|                     | <i>Ca. Thioglobus</i>      |              | 0.66              | 0.55 | 1   |
| Firmicutes          | <i>Halocella</i>           |              | –                 | 0.55 | –   |
| Alphaproteobacteria | <i>Albidovulum</i>         | <i>HPGDS</i> | –                 | 0.55 | –   |
|                     | <i>Altererythrobacter</i>  |              | –                 | 0.55 | –   |
|                     | <i>Ca. Pelagibacter</i>    |              | –                 | –    | 1   |
|                     | <i>Epibacterium</i>        |              | –                 | 0.55 | –   |
|                     | <i>Haematobacter</i>       |              |                   |      |     |
|                     | <i>Mesorhizobium</i>       |              | 0.66              | –    | –   |
|                     | <i>Planktomarina</i>       |              | 3.31              | 2.76 | 2   |
|                     | <i>Planktotalea</i>        |              | –                 | –    | 1   |
|                     | <i>Tardiphaga</i>          |              | –                 | –    | 1   |
| Betaproteobacteria  | <i>Burkholderia</i>        |              | –                 | 0.55 | –   |
| Gammaproteobacteria | <i>Bermanella</i>          |              | –                 | 0.55 | 1   |
|                     | <i>Ca. Thioglobus</i>      |              | 1.32              | 1.66 | 1   |
|                     | <i>Catenovulum</i>         |              | –                 | –    | 2   |
|                     | <i>Colwellia</i>           |              | –                 | –    | 2   |
|                     | <i>Marinomonas</i>         |              | –                 | 0.55 | –   |
|                     | <i>Methylophaga</i>        |              | –                 | 0.55 | –   |
|                     | <i>Oceanicoccus</i>        |              | 0.66              | –    | 1   |
|                     | <i>Parahaliea</i>          |              | –                 | 0.55 | –   |
|                     | <i>Thalassotalea</i>       |              | –                 | –    | 1   |
| Alphaproteobacteria | <i>Antarctobacter</i>      | <i>nahC</i>  | –                 | 0.55 | –   |
|                     | <i>Asciidiaceihabitans</i> |              | –                 | 0.55 | 1   |
|                     | <i>Cohaesibacter</i>       |              | –                 | 0.55 | –   |
|                     | <i>Epibacterium</i>        |              | 0.66              | –    | –   |
|                     | <i>Oceanicola</i>          |              | –                 | 0.55 | –   |
|                     | <i>Pannonibacter</i>       |              | 0.66              | –    | –   |
|                     | <i>Planktomarina</i>       |              | 0.66              | –    | –   |
|                     | <i>Planktotalea</i>        |              | 1.99              | 0.55 | 1   |
|                     | <i>Pseudopelagicola</i>    |              | –                 | 1.10 | –   |
|                     | <i>Rugeria</i>             |              | –                 | 0.55 | –   |
| Gammaproteobacteria | <i>Aliiglaciecola</i>      |              | –                 | –    | 1   |
|                     | <i>Colwellia</i>           |              | –                 | 0.55 | –   |

| Phylum/class        | Genus                       | Gene         | Normalized counts |      |     |
|---------------------|-----------------------------|--------------|-------------------|------|-----|
|                     |                             |              | SW                | SI   | SIO |
| Alphaproteobacteria | <i>Altererythrobacter</i>   | <i>nidAB</i> | 0.66              | –    | –   |
|                     | <i>Bradyrhizobium</i>       |              | –                 | 0.55 | –   |
|                     | <i>Brevundimonas</i>        |              | 0.66              | –    | –   |
|                     | <i>Ca. Pelagibacter</i>     |              | 2.65              | 2.76 | 5   |
|                     | <i>Ca. Puniceispirillum</i> |              | 2.65              | 1.10 | 1   |
|                     | <i>Cognatilyoonia</i>       |              | –                 | 0.55 | –   |
|                     | <i>Croceicoccus</i>         |              | –                 | 0.55 | –   |
|                     | <i>Enhydrobacter</i>        |              | 0.66              | –    | –   |
|                     | <i>Epibacterium</i>         |              | –                 | 0.55 | –   |
|                     | <i>Hwanghaeella</i>         |              | –                 | 0.55 | –   |
|                     | <i>Methylobacterium</i>     |              | –                 | 0.55 | –   |
|                     | <i>Monaibacterium</i>       |              | –                 | 0.55 | –   |
|                     | <i>Pelagicola</i>           |              | 0.66              | –    | –   |
|                     | <i>Planktomarina</i>        |              | 3.97              | 1.10 | 2   |
|                     | <i>Pseudaestuariivita</i>   |              | –                 | 0.55 | –   |
|                     | <i>Pseudophaeobacter</i>    |              | –                 | 0.55 | 1   |
|                     | <i>Roseovarius</i>          |              | 0.66              | 1.10 | –   |
|                     | <i>Ruegeria</i>             |              | 0.66              | –    | –   |
|                     | <i>Sphingobium</i>          |              | 0.66              | 0.55 | –   |
|                     | <i>Sphingomonas</i>         |              | 0.66              | –    | –   |
| Gammaproteobacteria | <i>Alcanivorax</i>          |              | –                 | 0.55 | –   |
|                     | <i>Ca. Thioglobus</i>       |              | 5.30              | 6.63 | 3   |
|                     | <i>Cobetia</i>              |              | 0.66              | –    | –   |
|                     | <i>Rudaea</i>               |              | 0.66              | –    | –   |
|                     | <i>Woeseia</i>              |              | –                 | 0.55 | –   |
| Actinobacteria      | <i>Amycolatopsis</i>        |              | 0.66              | –    | –   |
|                     | <i>Streptomyces</i>         |              | 1.32              | –    | –   |
| Bacteroidetes       | <i>Mangrovimonas</i>        |              | 0.66              | –    | –   |
| Cyanobacteria       | <i>Synechococcus</i>        |              | 0.66              | –    | –   |
| Firmicutes          | <i>Bacillus</i>             |              | –                 | 1.10 | 1   |

**Table S13.** Normalized counts (RPKG) of top100 prokaryotic genera associated with the genes or gene clusters from the gene group related to the degradation of various hydrocarbons. The associations based on the affiliation of the contigs containing sequences of respective genes in seawater (SW), sea ice (SI), and sea ice encapsulating crude oil (SIO) metagenomes. Archaea are given on green background.

| Phylum/class        | Genus                       | Gene           | Normalized counts |      |     |
|---------------------|-----------------------------|----------------|-------------------|------|-----|
|                     |                             |                | SW                | SI   | SIO |
| Alphaproteobacteria | <i>Bradyrhizobium</i>       | <i>chnB</i>    | 0.66              | 1.10 | –   |
|                     | <i>Ca. Pelagibacter</i>     |                | 7.95              | 9.39 | 12  |
|                     | <i>Ca. Thioglobus</i>       |                | 1.32              | 1.10 | –   |
|                     | <i>Hyphomonas</i>           |                | 0.66              | 0.55 | –   |
|                     | <i>Planktomarina</i>        |                | 1.32              | 0.55 | 2   |
|                     | <i>Planktotalea</i>         |                | –                 | –    | 1   |
|                     | <i>Rhodobacter</i>          |                | –                 | 0.55 | 1   |
|                     | <i>Sphingomonas</i>         |                | 0.66              | 1.10 | 1   |
| Betaproteobacteria  | <i>Chromobacterium</i>      | <i>dbfA1A2</i> | –                 | –    | 1   |
| Deltaproteobacteria | <i>Sandaracinus</i>         |                | –                 | –    | 1   |
| Gammaproteobacteria | <i>Bermanella</i>           |                | –                 | 0.55 | 3   |
|                     | <i>Colwellia</i>            |                | –                 | 0    | 1   |
|                     | <i>Glaciecola</i>           |                | –                 | 0.55 | 2   |
|                     | <i>Photobacterium</i>       |                | –                 | –    | 1   |
|                     | <i>Pseudomonas</i>          |                | –                 | 1.10 | –   |
|                     | <i>Thalassotalea</i>        |                | –                 | –    | 1   |
|                     | <i>Umboniibacter</i>        |                | 0.66              | 0.55 | –   |
| Actinobacteria      | <i>Actinoplanes</i>         |                | –                 | –    | 1   |
|                     | <i>Ilumatobacter</i>        |                | –                 | –    | 1   |
|                     | <i>Nonomuraea</i>           |                | 0.66              | 1.10 | –   |
|                     | <i>Pseudonocardia</i>       |                | –                 | 1.10 | –   |
|                     | <i>Saccharopolyspora</i>    |                | 0.66              | 0.55 | –   |
|                     | <i>Streptomonospora</i>     |                | 0.66              | 0.55 | –   |
|                     | <i>Streptomyces</i>         |                | 0.66              | 0.55 | –   |
| Fibrobacteres       | <i>Fibrobacter</i>          |                | –                 | –    | 1   |
| Firmicutes          | <i>Bacillus</i>             |                | –                 | 1.10 | 2   |
| Alphaproteobacteria | <i>Boseongicola</i>         | <i>ligAB</i>   | 0.66              | 0.55 | –   |
|                     | <i>Ca. Pelagibacter</i>     |                | 4.64              | 3.87 | 7   |
|                     | <i>Ca. Puniceispirillum</i> |                | 2.65              | 1.66 | 1   |
|                     | <i>Ca. Thioglobus</i>       |                | 6.62              | 8.29 | 3   |
|                     | <i>Planktomarina</i>        |                | 3.97              | 2.21 | 2   |
|                     | <i>Pseudophaeobacter</i>    |                | –                 | 0.55 | 1   |
|                     | <i>Roseovarius</i>          |                | 0.66              | 1.10 | –   |
|                     | <i>Sphingobium</i>          |                | 0.66              | 0.55 | –   |
| Actinobacteria      | <i>Streptomyces</i>         | <i>nagGH</i>   | 1.32              | –    | –   |
| Firmicutes          | <i>Bacillus</i>             |                | –                 | 1.10 | 1   |
| Alphaproteobacteria | <i>Reyranella</i>           |                | –                 | –    | 1   |
| Betaproteobacteria  | <i>Variovorax</i>           |                | 0.66              | –    | 1   |
| Gammaproteobacteria | <i>Arenicella</i>           | <i>nagGH</i>   | –                 | –    | 1   |
|                     | <i>Parahaliea</i>           |                | –                 | –    | 1   |
| Alphaproteobacteria | <i>Boseongicola</i>         | <i>nagGH</i>   | 0.66              | 0.55 | –   |

| Phylum/class         | Genus                       | Gene            | Normalized counts |      |     |
|----------------------|-----------------------------|-----------------|-------------------|------|-----|
|                      |                             |                 | SW                | SI   | SIO |
|                      | <i>Ca. Pelagibacter</i>     | <i>nagGH</i>    | 5.30              | 4.42 | 7   |
|                      | <i>Ca. Puniceispirillum</i> |                 | 2.65              | 2.76 | 1   |
|                      | <i>Ca. Thioglobus</i>       |                 | 6.62              | 8.84 | 4   |
|                      | <i>Planktomarina</i>        |                 | 3.97              | 2.21 | 2   |
|                      | <i>Pseudooceanicola</i>     |                 | 0.66              | 0.55 | 1   |
|                      | <i>Pseudophaeobacter</i>    |                 | –                 | 0.55 | 1   |
|                      | <i>Roseovarius</i>          |                 | 0.66              | 1.10 | –   |
|                      | <i>Sphingobium</i>          |                 | 0.66              | 0.55 | –   |
| Gamma proteobacteria | <i>Colwellia</i>            |                 | –                 | –    | 1   |
| Actinobacteria       | <i>Streptomyces</i>         |                 | 1.32              | –    | –   |
| Firmicutes           | <i>Bacillus</i>             |                 | –                 | 1.10 | 1   |
| Alphaproteobacteria  | <i>Ca. Pelagibacter</i>     | <i>nahAabcd</i> | 4.64              | 3.31 | 7   |
|                      | <i>Ca. Puniceispirillum</i> |                 | 2.65              | 1.66 | 1   |
|                      | <i>Ca. Thioglobus</i>       |                 | 5.30              | 7.73 | 3   |
|                      | <i>Planktomarina</i>        |                 | 3.97              | 2.21 | 2   |
|                      | <i>Pseudophaeobacter</i>    |                 | –                 | 0.55 | 1   |
|                      | <i>Roseovarius</i>          |                 | –                 | 1.10 | –   |
|                      | <i>Sphingobium</i>          |                 | 0.66              | 0.55 | –   |
| Actinobacteria       | <i>Streptomyces</i>         |                 | 1.32              | –    | –   |
| Firmicutes           | <i>Bacillus</i>             |                 | –                 | 1.10 | 1   |
| Alphaproteobacteria  | <i>Agrobacterium</i>        | <i>pcaGH</i>    | 0.66              | 0.55 | –   |
|                      | <i>Ascidiaceihabitans</i>   |                 | 0.66              | 0.55 | –   |
|                      | <i>Devosia</i>              |                 | 0.66              | 0.55 | –   |
|                      | <i>Octadecabacter</i>       |                 | 1.32              | 0.55 | 2   |
|                      | <i>Planktomarina</i>        |                 | 1.32              | 0.55 | 2   |
|                      | <i>Sinorhizobium</i>        |                 | 0.66              | 0.55 | –   |
|                      | <i>Sulfitobacter</i>        |                 | –                 | 0.55 | 1   |
|                      | <i>Tateyamaria</i>          |                 | –                 | –    | 1   |
| Alphaproteobacteria  | <i>Ascidiaceihabitans</i>   | <i>phdIJ</i>    | 0.66              | 1.10 | –   |
|                      | <i>Ca. Pelagibacter</i>     |                 | 0.66              | 2.21 | 5   |
|                      | <i>Ca. Puniceispirillum</i> |                 | 0.66              | 0.55 | 2   |
|                      | <i>Ca. Thioglobus</i>       |                 | 0.66              | 0.55 | –   |
|                      | <i>Inquilinus</i>           |                 | –                 | –    | 1   |
|                      | <i>Jannaschia</i>           |                 | –                 | 0.55 | 1   |
|                      | <i>Lentibacter</i>          |                 | 0.66              | 1.10 | 1   |
|                      | <i>Planktomarina</i>        |                 | 3.31              | 1.10 | 3   |
|                      | <i>Rhodobacter</i>          |                 | 0.66              | 1.10 | –   |
| Gamma proteobacteria | <i>Bermanella</i>           |                 | –                 | 0.55 | 2   |
|                      | <i>Glaciecola</i>           |                 | –                 | 0.55 | 1   |
| Actinobacteria       | <i>Ca. Actinomarina</i>     |                 | –                 | –    | 1   |
|                      | <i>Microbacterium</i>       |                 | –                 | –    | 1   |
| Cyanobacteria        | <i>Synechococcus</i>        |                 | 2.65              | 1.10 | –   |
| Alphaproteobacteria  | <i>Antarctobacter</i>       | <i>yaiY</i>     | –                 | –    | 1   |
|                      | <i>Ca. Pelagibacter</i>     |                 | 5.96              | 5.52 | 6   |
|                      | <i>Ca. Thioglobus</i>       |                 | 0.66              | 1.66 | –   |
|                      | <i>Celeribacter</i>         |                 | 0.66              | 0.55 | 1   |

| Phylum/class        | Genus                   | Gene        | Normalized counts |      |     |
|---------------------|-------------------------|-------------|-------------------|------|-----|
|                     |                         |             | SW                | SI   | SIO |
| Alphaproteobacteria | <i>Epibacterium</i>     | <i>yaiY</i> | 0.66              | –    | 1   |
|                     | <i>Oceaniovalibus</i>   |             | –                 | –    | 1   |
|                     | <i>Octadecabacter</i>   |             | 0.66              | 0.55 | 1   |
|                     | <i>Planktomarina</i>    |             | 1.32              | 1.66 | 1   |
|                     | <i>Ponticoccus</i>      |             | –                 | 0.55 | 1   |
|                     | <i>Roseobacter</i>      |             | –                 | 1.10 | –   |
|                     | <i>Siccirubricoccus</i> |             | –                 | 0.55 | 1   |
|                     | <i>Sulfitobacter</i>    |             | –                 | 0.55 | 1   |
|                     |                         |             |                   |      |     |
| Gammaproteobacteria | <i>Colwellia</i>        |             | –                 | –    | 4   |
|                     | <i>Gallaecimonas</i>    |             | 0.66              | 0.55 | –   |
|                     | <i>Thalassotalea</i>    |             | 0.66              | 0.55 | 1   |
|                     | <i>Umboniibacter</i>    |             | –                 | –    | 1   |
| Thaumarchaeota      | <i>Nitrosopumilus</i>   |             | –                 | –    | 1   |

**Table S14.** The characteristics of all metagenome assembled genomes (MAGs) recovered from seawater (SW), sea ice (SI) and crude oil encapsulating sea ice (SIO) metagenomes. Red text indicates MAGs that fit within quality standards and were used in further analyses.

| Metagenome | MAG    | Completeness | Contamination |
|------------|--------|--------------|---------------|
| SW         | SW 6B  | 100.00       | 749.47        |
|            | SW 10B | 94.19        | 1.72          |
|            | SW 7B  | 83.11        | 1.46          |
|            | SW 15B | 81.03        | 65.13         |
|            | SW 13B | 77.85        | 3.14          |
|            | SW 5B  | 74.21        | 0.51          |
|            | SW 19B | 71.43        | 3.73          |
|            | SW 8B  | 70.17        | 56.38         |
|            | SW 11B | 69.89        | 23.57         |
|            | SW 9B  | 67.95        | 60.92         |
|            | SW 16B | 66.79        | 0.68          |
|            | SW 1B  | 63.23        | 2.33          |
|            | SW 2B  | 46.55        | 1.72          |
|            | SW 3B  | 43.48        | 2.97          |
|            | SW 12B | 34.99        | 0.00          |
|            | SW 17B | 27.59        | 0.86          |
|            | SW 4B  | 18.81        | 4.39          |
|            | SW 14  | 16.14        | 0.00          |
|            | SW 18  | 0.00         | 0.00          |
|            | SW 1A  | 80.84        | 0.00          |
|            | SW 2A  | 17.76        | 0.93          |
| SI         | SI 19B | 100.00       | 701.50        |
|            | SI 21B | 94.45        | 2.03          |
|            | SI 18B | 87.93        | 65.52         |
|            | SI 12B | 76.76        | 1.97          |
|            | SI 20B | 76.10        | 63.94         |
|            | SI 7B  | 75.74        | 36.05         |
|            | SI 15B | 73.82        | 3.22          |
|            | SI 8B  | 73.72        | 12.53         |
|            | SI 24B | 67.20        | 3.35          |
|            | SI 4B  | 53.06        | 1.68          |
|            | SI 23B | 52.54        | 0.61          |
|            | SI 14B | 51.01        | 11.72         |
|            | SI 22B | 50.26        | 30.69         |
|            | SI 27B | 50.00        | 1.72          |
|            | SI 28B | 37.93        | 0.00          |
|            | SI 5B  | 35.90        | 0.50          |
|            | SI 3B  | 23.20        | 5.17          |
|            | SI 25B | 19.30        | 1.75          |
|            | SI 17B | 19.12        | 3.45          |
|            | SI 6B  | 17.41        | 0.00          |
|            | SI 1B  | 13.79        | 0.00          |
|            | SI 16B | 12.50        | 0.00          |
|            | SI 2B  | 9.48         | 1.72          |

| Metagenome | MAG     | Completeness | Contamination |
|------------|---------|--------------|---------------|
| SI         | SI 26B  | 8.77         | 0.00          |
|            | SI 13B  | 8.33         | 0.00          |
|            | SI 9B   | 5.17         | 0.00          |
|            | SI 11B  | 0.00         | 0.00          |
|            | SI 10B  | 0.00         | 0.00          |
|            | SI 1A   | 42.69        | 0.00          |
|            | SIO 12B | 98.46        | 1.01          |
| SIO        | SIO 3B  | 95.30        | 204.11        |
|            | SIO 8B  | 81.03        | 3.45          |
|            | SIO 15B | 77.90        | 81.3          |
|            | SIO 11B | 68.39        | 19.86         |
|            | SIO 18B | 57.41        | 16.95         |
|            | SIO 10B | 51.37        | 20.19         |
|            | SIO 7B  | 50.00        | 5.17          |
|            | SIO 6B  | 24.91        | 3.64          |
|            | SIO 5B  | 22.97        | 7.18          |
|            | SIO 2B  | 22.56        | 4.66          |
|            | SIO 4B  | 17.53        | 0.49          |
|            | SIO 16B | 10.34        | 0.00          |
|            | SIO 9B  | 8.33         | 4.17          |
|            | SIO 13B | 8.33         | 0.00          |
|            | SIO 17B | 0.86         | 0.00          |
|            | SIO 14B | 0.00         | 0.00          |
|            | SIO 1B  | 0.00         | 0.00          |



**Table S15.** Taxonomy of good and high quality metagenome-assembled genomes assembled from metagenomes of seawater (SW), sea ice (SI), and crude oil encapsulating sea ice (SIO). Taxonomic level: k – kingdom; p – phylum; c – class; o – order; f – family; g – genus; s – species. B (bacteria) or A (archaea) in MAGs name indicate kingdom. Cut off value for ANIb was 95% and 90% for Kaiju. \*More than 60% of contigs in MAG indicated to same genus or species.

| Metagenome | MAG     | Classification: CheckM  | Classification: Kaiju (%)                                                                | Classification: JSpeciesWS (ANIb)          |
|------------|---------|-------------------------|------------------------------------------------------------------------------------------|--------------------------------------------|
| SW         | SW 1B   | (k) Bacteria            | (p) Bacteroidetes (98.70)                                                                | –                                          |
|            | SW 5B   | (o) Actinomycetales     | (p) Actinobacteria (95.61)                                                               | –                                          |
|            | SW 7B   | (f) Rhodobacteraceae    | (f) Rhodobacteraceae (96.42)                                                             | (s) Rhodobacteraceae bacterium SB2 (99.03) |
|            | SW 10B  | (k) Bacteria            | (p) Planctomycetes (96.17)                                                               | –                                          |
|            | SW 13B  | (f) Rhodobacteraceae    | (s) Planktomarina temperata (95.85)                                                      | (s) Planktomarina temperata RCA23 (98.43)  |
|            | SW 16B  | (k) Bacteria            | (k) Bacteria (100.00)                                                                    | –                                          |
|            | SW 19B  | (c) Gammaproteobacteria | (f) Halieaceae (91.67)                                                                   | –                                          |
|            | SW 1A   | (p) Euryarchaeota       | (s) Candidatus Poseidoniales archaeon (90.41)                                            | –                                          |
| SI         | SI 4B   | (p) Proteobacteria      | (g) Candidatus Thioglobus (90.15)                                                        | –                                          |
|            | SI 12B  | (f) Rhodobacteraceae    | (s) Planktomarina temperate (98.65)                                                      | (s) Planktomarina temperata RCA23 (98.29)  |
|            | SI 15B  | (f) Rhodobacteraceae    | (f) Rhodobacteraceae (98.45)                                                             | (s) Rhodobacteraceae bacterium SB2 (98.92) |
|            | SI 21B  | (f) Rhodobacteraceae    | (f) Rhodobacteraceae (95.55)                                                             | –                                          |
|            | SI 23B  | (o) Actinomycetales     | (p) Actinobacteria (98.50)                                                               | –                                          |
|            | SI 24B  | (p) Proteobacteria      | (p) Proteobacteria (98.98)<br><b>*(s)Betaproteobacteria bacterium<br/>TMED22 (85.76)</b> | –                                          |
|            | SI 27B  | (k) Bacteria            | (c) Alphaproteobacteria (95.08)                                                          | –                                          |
| SIO        | SIO 7B  | (k) Bacteria            | (c) Gammaproteobacteria (96.89)<br><b>*(g) Bermanella (61.41)</b>                        | –                                          |
|            | SIO 8B  | (k) Bacteria            | (o) Alteromonadales (90.91)<br><b>*(g) Glaciecola (75.08)</b>                            | –                                          |
|            | SIO 12B | (f) Rhodobacteraceae    | (f) Rhodobacteraceae (97.67)                                                             | –                                          |

## Supplementary figures

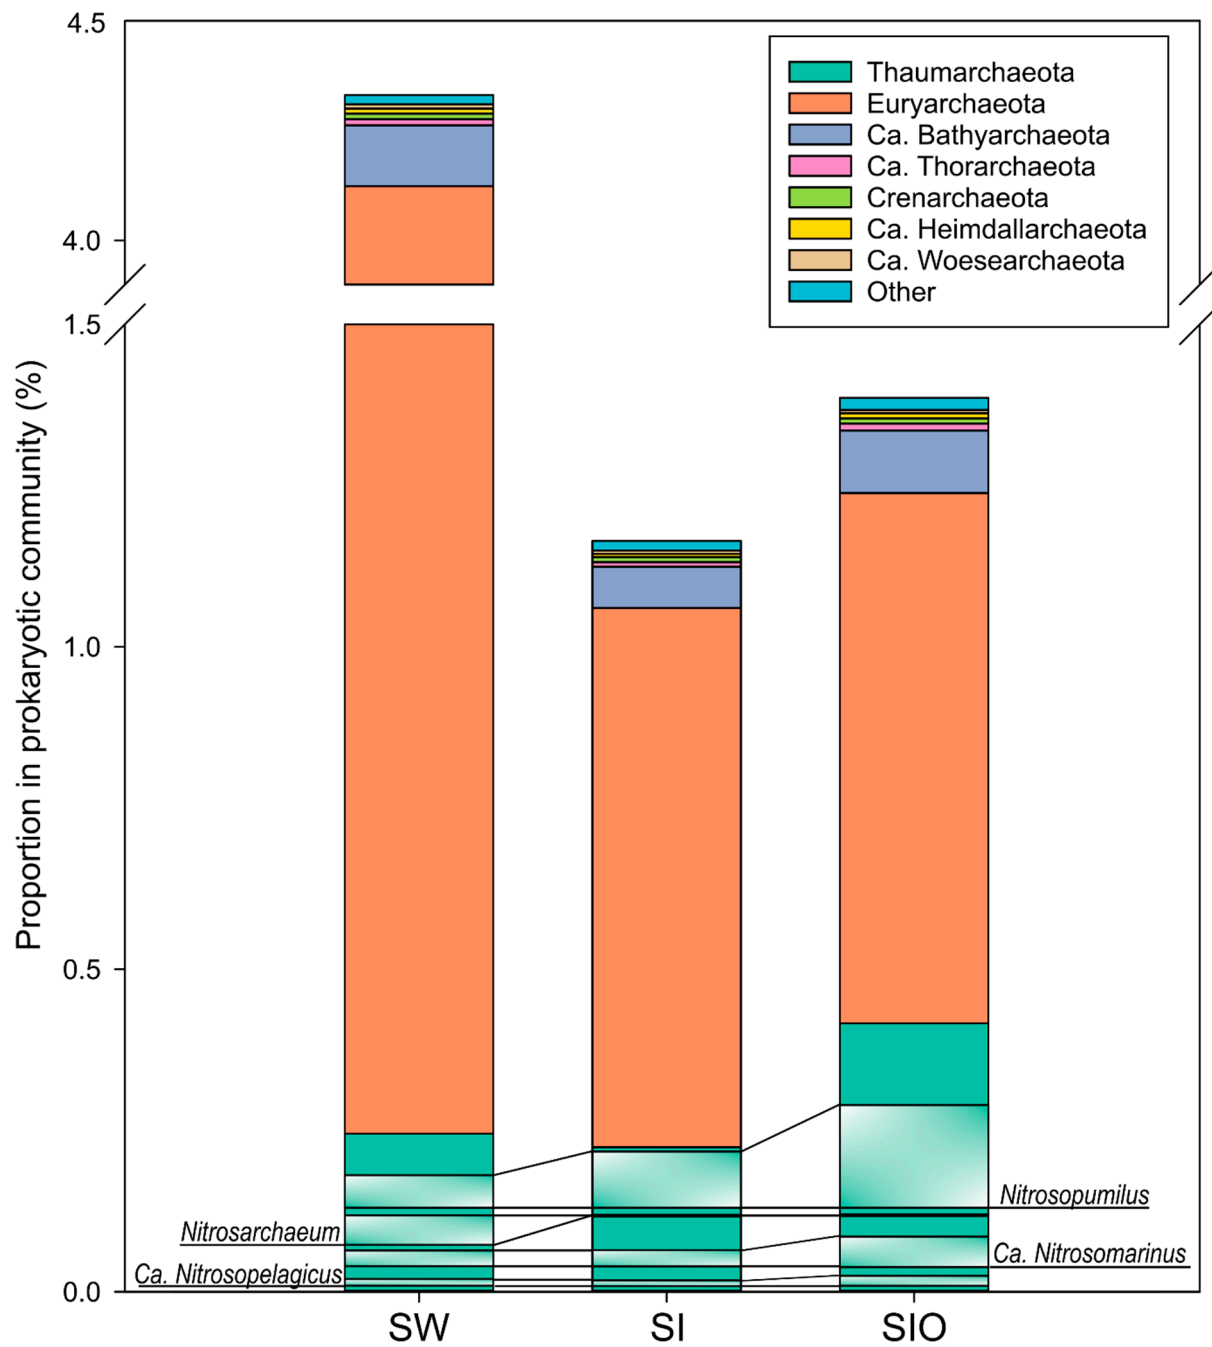

**Figure S1.** The proportions of archaeal phyla and most dominant archaeal genera in the prokaryotic community of seawater (SW), sea ice (SI), and crude oil encapsulating sea ice (SIO).
